# Supplementary material
Source: publisher figshare collection journal article supplement (https://gsajournals.figshare.com/ndownloader/files/24962516)
Supplement: Supplementary file 1 [file 24962516]

## Sheet: Sheet1
Table S1. CRISPRa lines used in this study
Target gene	sgRNA sequence	vector	THFC#
vn	AGCATTCACAACGTATCTCA	flySAM	TH13287.S
	ACGACTCAAACGTATCTCAC	flySAM	TH13751.S
	GTGCCGAAGATATTCGAACA	flySAM	TH13162.S
	CTGCAGGGTTGAGAAAATGC	flySAM	TH13753.S
	TTAATATGGAACATCAAGGA	flySAM	TH13529.S
	GAGAGAGCGAGAGAGTAAAT	flySAM	TH13530.S
	GTTCGATTTCCCTCCTAGTT	flySAM	TH13756.S
upd1	ATTCGGGGTATCCTATTCCC	flySAM	TH13270.S
	CCTCGTGGATAGTTCTCGAA	flySAM	TH14781.S
upd2	GCGGCCGAGAGAGCGAGAGA	flySAM	TH13836.S
	TGGGCGGTGGGTGGGTACGC	flySAM	TH14780.S
hh	AGGGTGCTTTCAAGAACCCT	flySAM	TH13516.S
	ACAGCCGATCGAACGTCGAG	flySAM	TH12270.S
	TTCCACTTCCCTTGCGCATA	flySAM	TH13757.S
	TGCCTTATGCGCAAGGGAAG	flySAM	TH12271.S
	TGCGCAAGGGAAGTGGAAGC	flySAM	TH13758.S
	TACATAAGAGCCGAAGACTC	flySAM	TH13760.S
	GGCATTGGCATAGTGTGCTG	flySAM	TH13517.S
	TGTGGCTTGTTAGCCGCTTC	flySAM	TH13765.S
	AAGTGAACAATGGCCTGCGA	flySAM	TH13766.S
	GGGGCATATGAATGACTCAC	flySAM	TH13768.S
	ACTTTCATCCATGGCCATAA	flySAM	TH13761.S
dpp	TTGCCTTGCCTCGGCCGCTT	flySAM	TH13777.S
	CGTCCAAAGCGGCCGAGGCA	flySAM	TH13163.S
	AGGCAAAAGCGATCCGGAGA	flySAM	TH13779.S
	AAGCAACTTGCCATCGTGGT	flySAM	TH13781.S
	ACACACACTGCCGACCACGA	flySAM	TH13523.S
	CGGAGACTGTGGACTGAAGA	flySAM	TH13784.S
	AGACTGTGGACCGGAGACTG	flySAM	TH13524.S
	TCTGTGTTGACTGTAGACTG	flySAM	TH13786.S
	GTGTAACAGCTCTGTGGCTT	flySAM	TH13788.S
	CGGCGCTGCCGCAACTGGTT	flySAM	TH13789.S
	CTAAATCTCGGACTAAGTCG	flySAM	TH13790.S
	CTCGAACAAGCCGAACAATC	flySAM	TH13791.S
	GATATGGTGAGTAAGGCTTG	flySAM	TH13793.S
	GTTTGTTATTGTTGCCTTAG	flySAM	TH13783.S
